# Supplementary material
Source: publisher site journal article supplement (https://www.dovepress.com/article/274047)
Supplement: Supplementary file 1 [file get_supplementary_file.php]

**Supplement**

**Supplement Table 1: Pericardial fat and cardiometabolic parameters**

**between non-valvular AF and non-AF patients in men and women**

|  | **Men** | **1113** |  | **Women** | **893** |  |
| --- | --- | --- | --- | --- | --- | --- |
|  | **Non-AF (1017)** | **AF (96)** | **Pvalue** | **Non-AF (851)** | **AF (42)** | **Pvalue** |
| Age, years | 64.0 (63.3-64.8) | 65.4 (62.9-67.8) | 0.322 | 66.1 (65.4-66.8) | 71.7 (68.8-74.5) | 0.001 |
| **Percardial fat** |  |  |  |  |  |  |
| EFV, cm3 | 74.3 (72.3-76.3) | 83.0 (76.9-89.1) | 0.012 | 72.7 (70.8-74.7) | 86.2 (78.8-936) | 0.003 |
| PaCFV, cm3 | 47.9 (46.0-49.9) | 48.0 (41.0-55.0) | 0.982 | 35.6 (34.0-37.1) | 41.5 (34.3-48.8) | 0.102 |
| PeCFV, cm3 | 122.3 (118-125) | 131.2 (119-143) | 0.149 | 108.4 (105-111) | 128.0 (115-140) | 0.006 |
| PAFV, cm3 | 18.0 (17.4-18.7) | 17.4 (15.4-19.5) | 0.582 | 11.2 (10.8-11.6) | 14.3 (11.8-16.8) | 0.001 |
| **Echo** |  |  |  |  |  |  |
| LAD, cm | 37.4 (37.1-37.7) | 42.8 (41.2-44.3) | <0.001 | 35.7 (35.4-36.0) | 43.5 (41.7-45.2) | <0.001 |
| EF, % | 62.7 (63.4-63.9) | 60.2 (58.4-61.9) | 0.001 | 64.7 (64.4-65.0) | 61.5 (59.4-63.6) | <0.001 |
| CAC scores | 252.7 (180-226) | 262.9 (146-379) | 0.865 | 144.6 (116-172) | 197.7 (114-280) | 0.407 |
| Obstructive CAD, % (n) | 42.3 (430) | 41.7 (40) | 0.498 | 26.6 (226) | 40.5 (17) | 0.029 |
| **Cardiometablic risks** |  |  |  |  |  |  |
| BMI, kg/m2 | 24.5 (24.3-24.7) | 25.0 (24.4-25.6) | 0.132 | 23.9 (23.7-24.2) | 25.4 (24.2-26.6) | 0.006 |
| SBP, mmHg | 135.8 (134-137) | 134.2 (130-138) | 0.467 | 135.6 (134-136) | 141.9 (135-148) | 0.048 |
| Heart rate, beats/minute | 77.5 (76.6-78.4) | 79.1 (77.6-82.2) | 0.040 | 76.5 (75.7-77.2) | 82.9 (77.4-88.3) | <0.001 |
| FG, mmol/L | 6.03 (5.89-6.17) | 5.84 (5.35-6.33) | 0.440 | 5.75 (5.61-5.89) | 5.92 (5.09-6.74) | 0.608 |
| TC, mmol/L | 4.37 (4.30-4.44) | 4.22 (4.02-4.42) | 0.195 | 4.83 (4.76-4.91) | 4.46 (4.13-4.79) | 0.032 |
| HDL-C, mmol/L | 1.17 (1.15-1.19) | 1.11 (1.05-1.16) | 0.103 | 1.38 (1.36-1.41) | 1.29 (1.17-1.41) | 0.173 |
| Creatinine, mmol/L | 85.6 (81.9-89.4) | 88.8 (80.6-97.0) | 0.621 | 66.9 (63.5-70.2) | 65.8 (61.1-70.5) | 0.892 |
| Smokers, % (n) | 34.5 (351) | 35.4 (33) | 0.538 | 1.6 (16) | 0 | 0.507 |
| Statin use, % (n) | 7.8 (79) | 13.5 (13) | 0.045 | 6.8 (58) | 14.3 (6) | 0.073 |
| Hypertension meds, % (n) | 34.5 (351) | 43.8 (42) | 0.046 | 36.0 (306) | 40.5 (17) | 0.330 |
| Hypoglycemic meds, % (n) | 12.9 (131) | 6.3 (6) | 0.035 | 13.3 (113) | 11.9 (5) | 0.512 |
| β-blocker, % (n) | 5.8 (59) | 10.4 (10) | 0.058 | 4.0 (34) | 4.8 (2) | 0.514 |

Data are presented as mean (95% confidence interval, CI) for continuous or % (n) for categorical characteristics.

Abbreviations: AF, atrial fibrillation; EFV, epicardial fat adipose tissue volume; PaCFV, paracardial fat adipose tissue volume; PeCFV, pericardial fat adipose tissue volume = PaCFV+EFV; PAFV, periaortic fat adipose tissue volume; LAD, left atrial diameter; EF, ejection fraction; CAC, coronary artery calcium; CAD, coronary artery disease; BMI, Body mass index; SBP, systolic hypertension; LAD, left atrial diameter; EF, ejection fraction; CAC scores, coronary artery calcium scores; FG, fast glucose; HbA1c, hemoglobin A1c; TC, total cholesterol; HDL-C, high density lipoprotein cholesterol; HT, hypertension; DM, diabetes mellitus.
